# Supplementary material for: NAT10 resolves harmful nucleolar R-loops depending on its helicase domain and acetylation of DDX21
Source: PubMed Central journal article supplement — Cell Commun Signal. 2024 Oct 11;22:490. doi: 10.1186/s12964-024-01869-3 (PMC11468200; doi:10.1186/s12964-024-01869-3), 2024-10-11

Source data for Figure 1

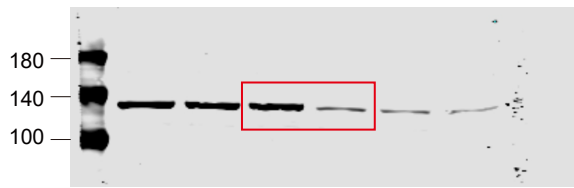

Figure 1A anti-NAT10

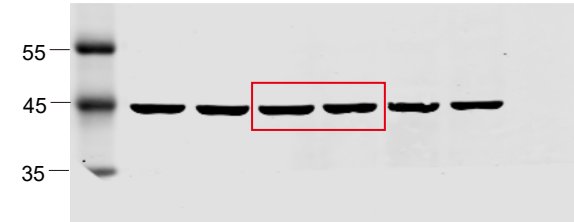

Figure 1A anti- $\beta$ -actin

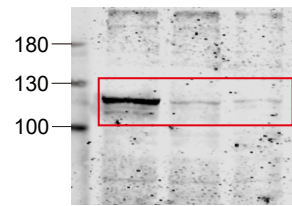

Figure 1D anti-NAT10

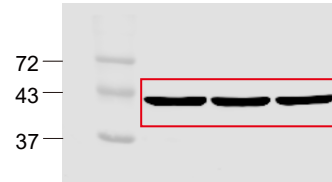

Figure 1D anti- $\beta$ -actin

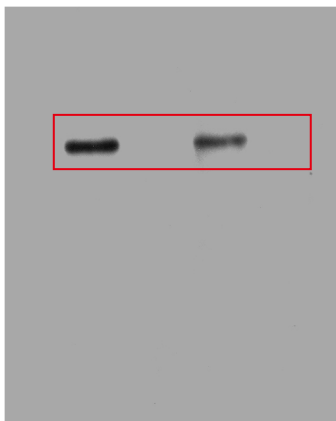

Figure 1I 45S pre-rRNA shorter exposure

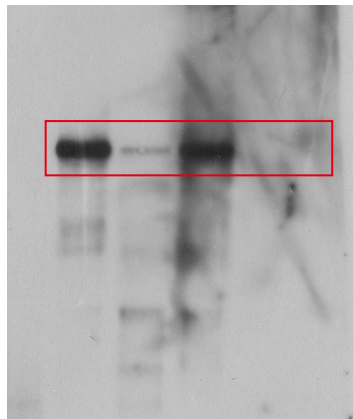

Figure 1I 45S pre-rRNA longer exposure

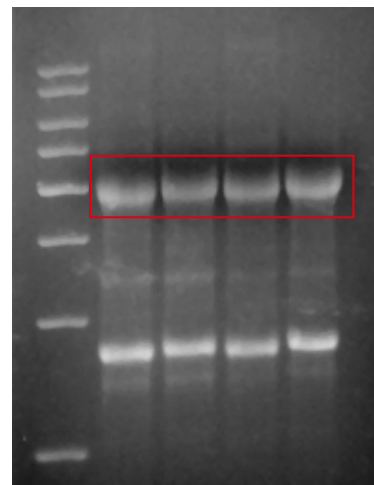

Figure 1I 28S rRNA

Source data for Figure 2

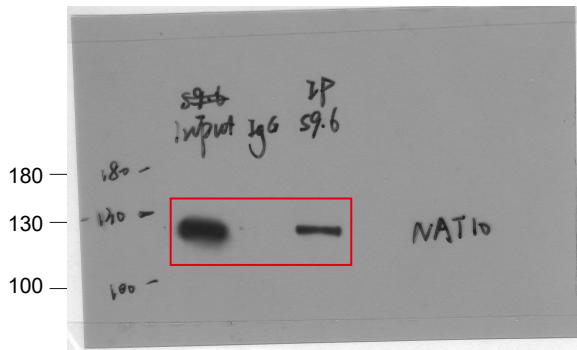

Figure 2B anti-NAT10

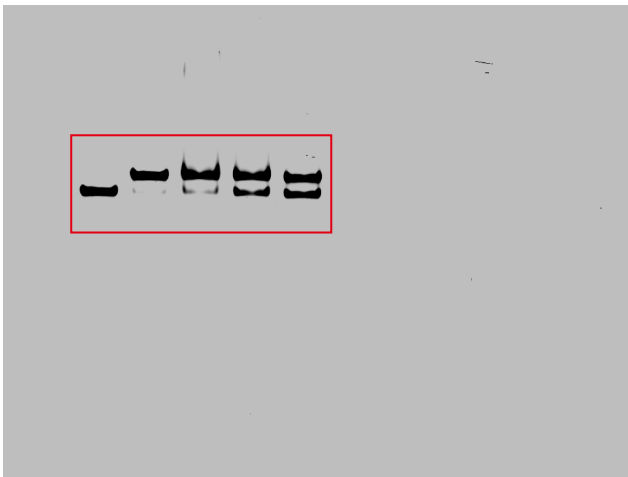

Figure 2D

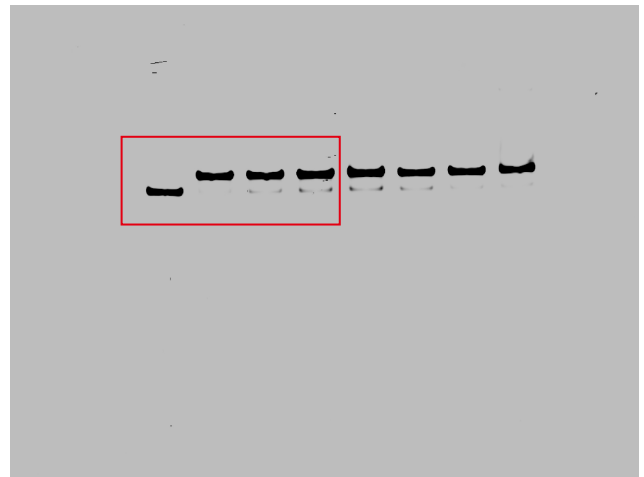

Figure 2E

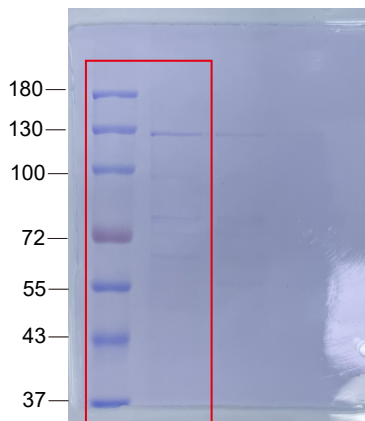

Figure 2F His-NAT10

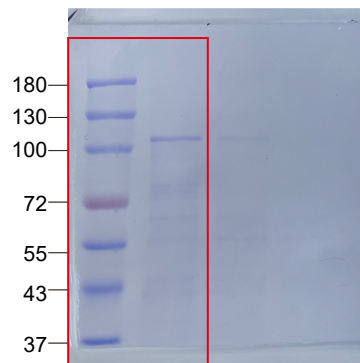

Figure 2F His-NAT10  $\Delta$ RHD



Source data for Figure 3

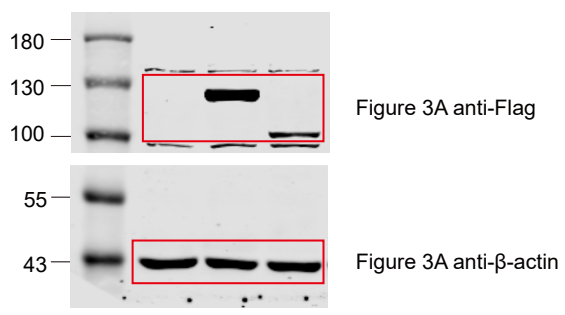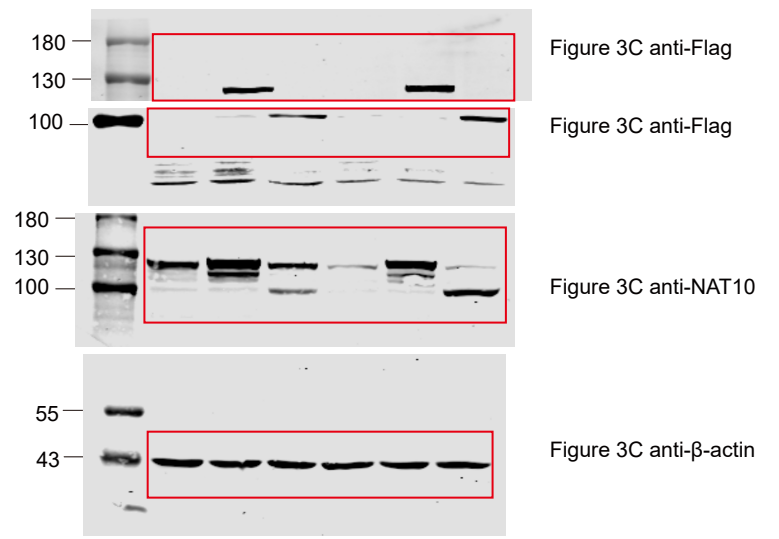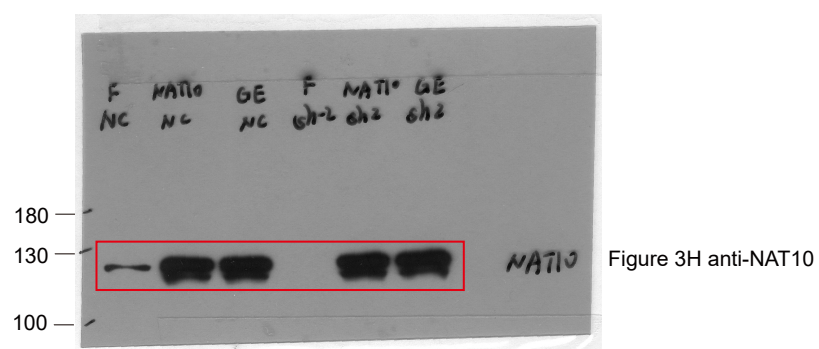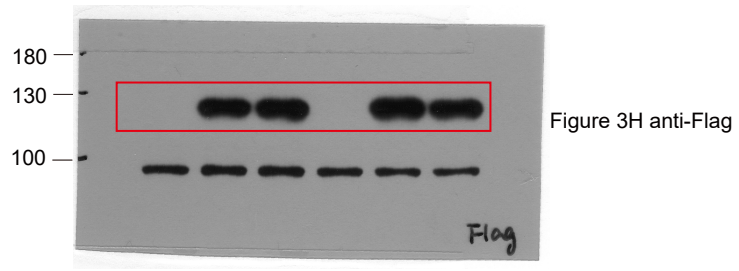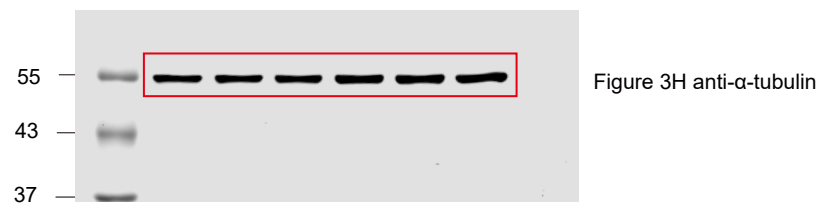

Source data for Figure 4

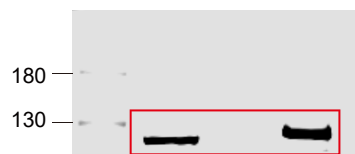

Figure 4E anti-NAT10

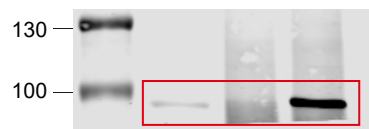

Figure 4F anti-DDX21

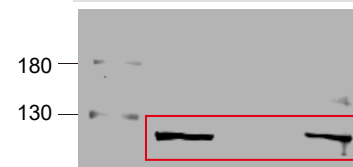

Figure 4F anti-NAT10

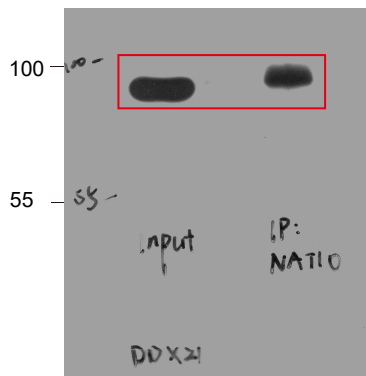

Figure 4E anti-DDX21

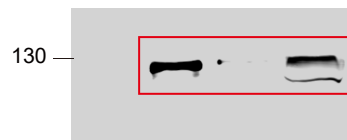

Figure 4G anti-NAT10

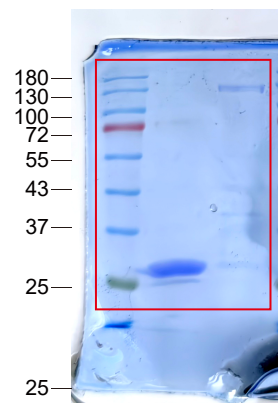

Figure 4G GST-DDX21

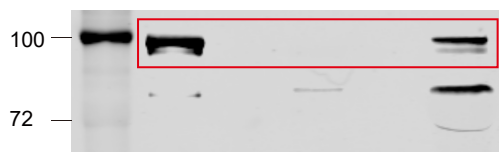

Figure 4H anti-DDX21

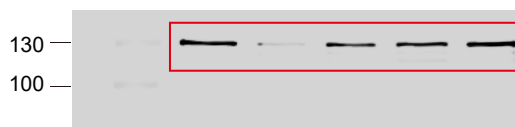

Figure 4I anti-NAT10

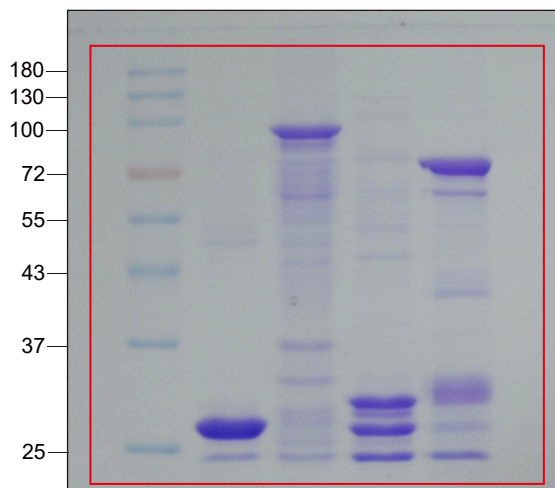

Figure 4H GST-NAT10

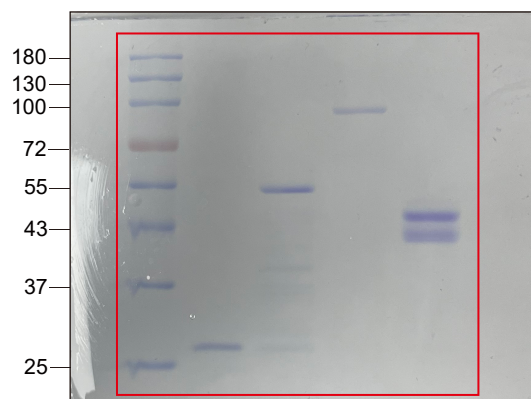

Figure 4I GST-DDX21

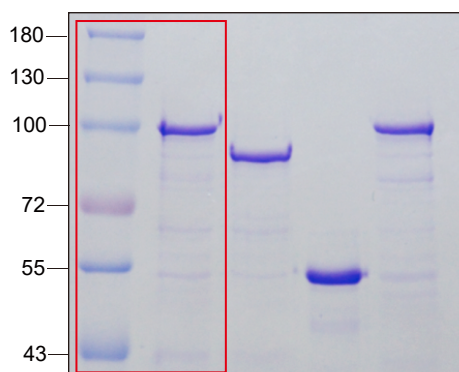

Figure 4H His-DDX21

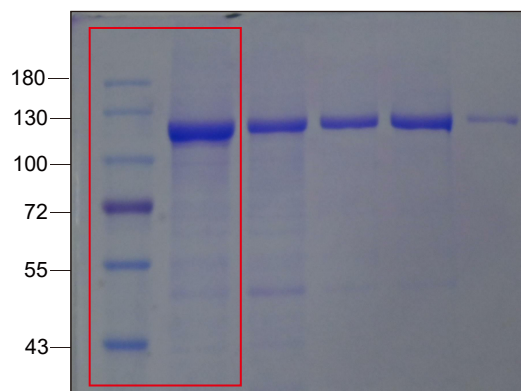

Figure 4I Flag-NAT10

Source data for Figure 5-1

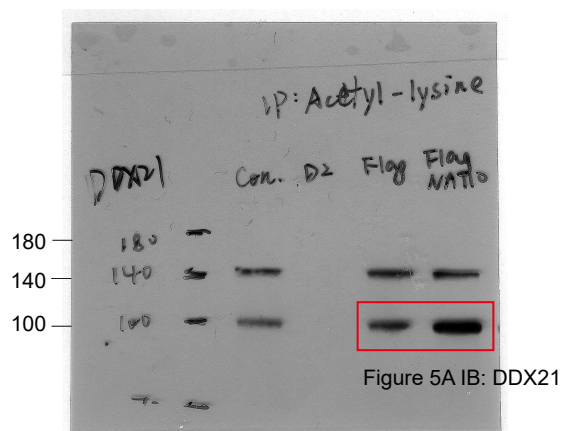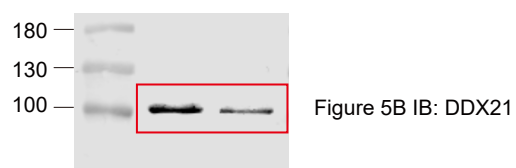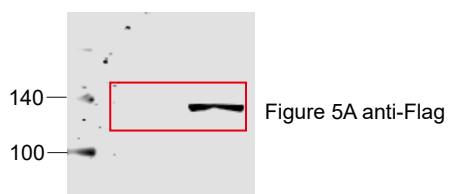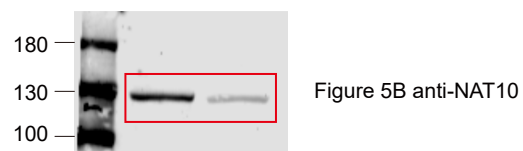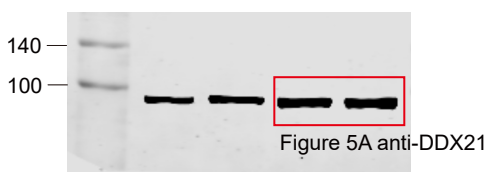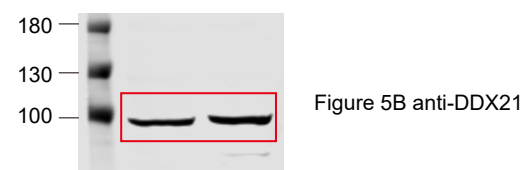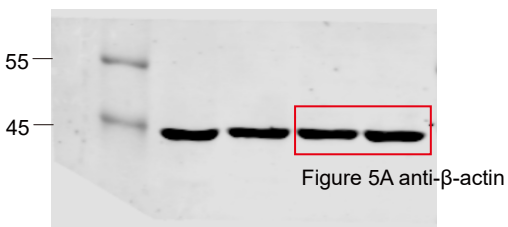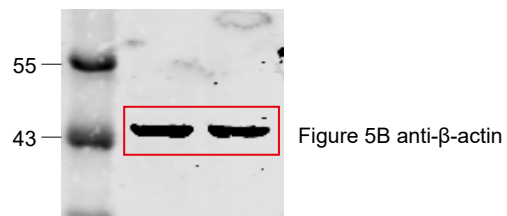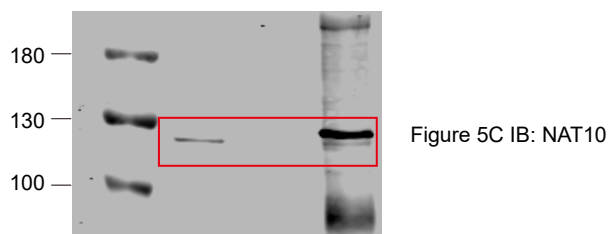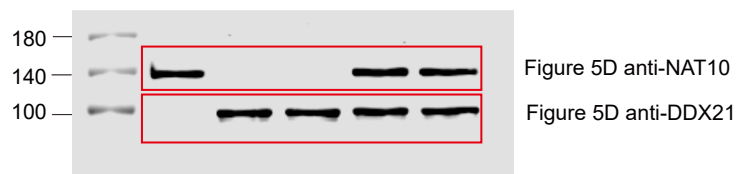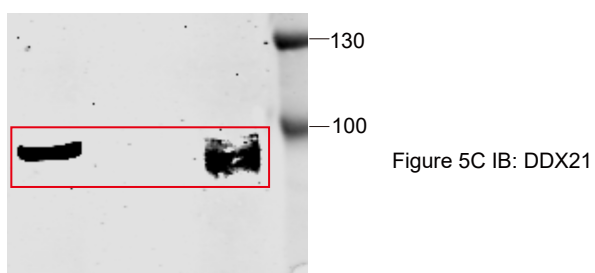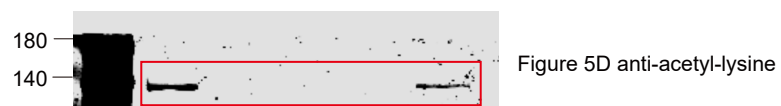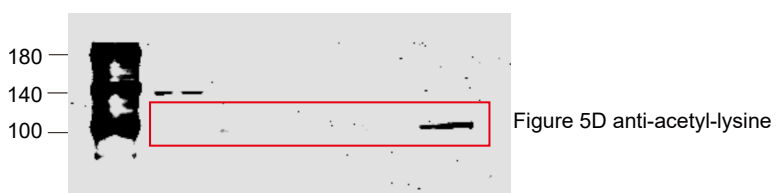

## Source data for Figure 5-2

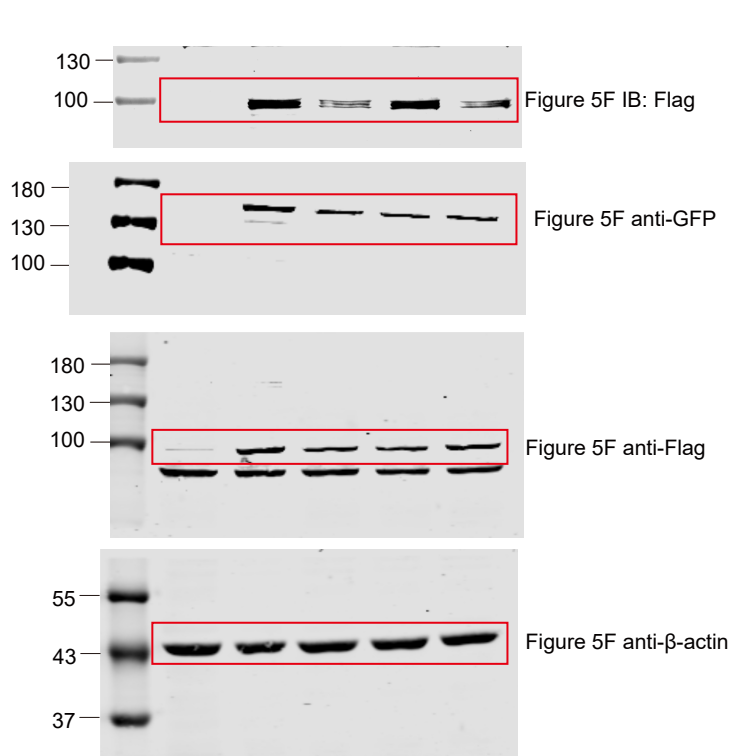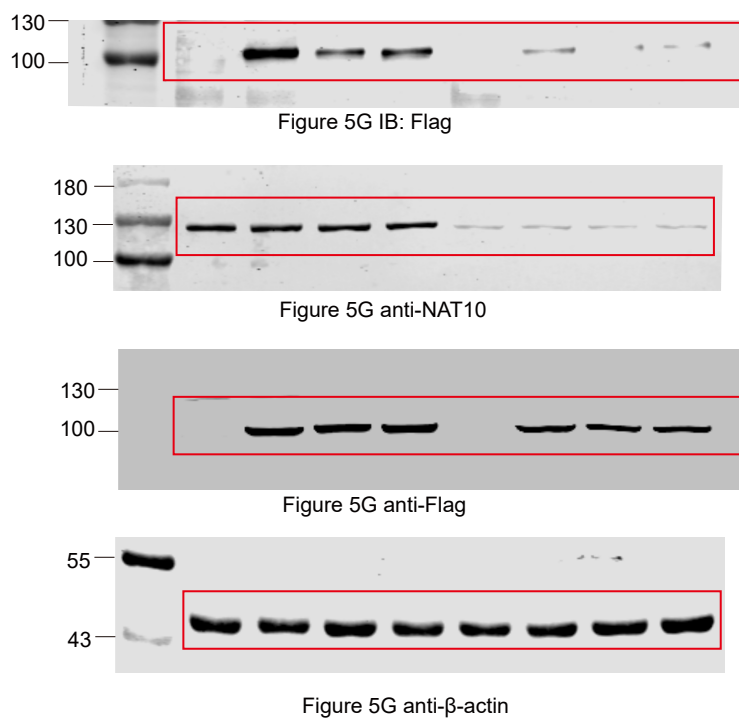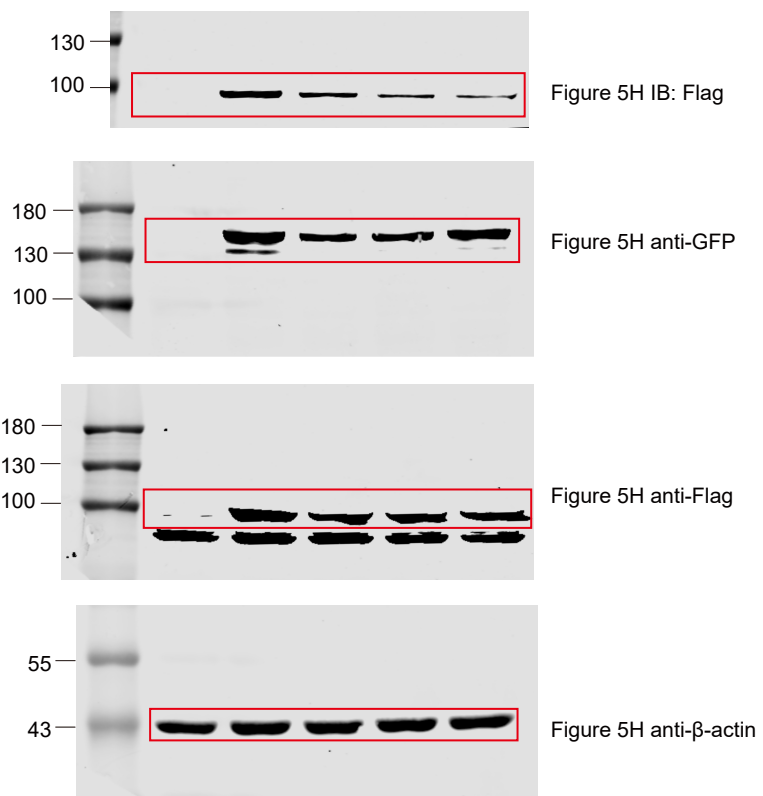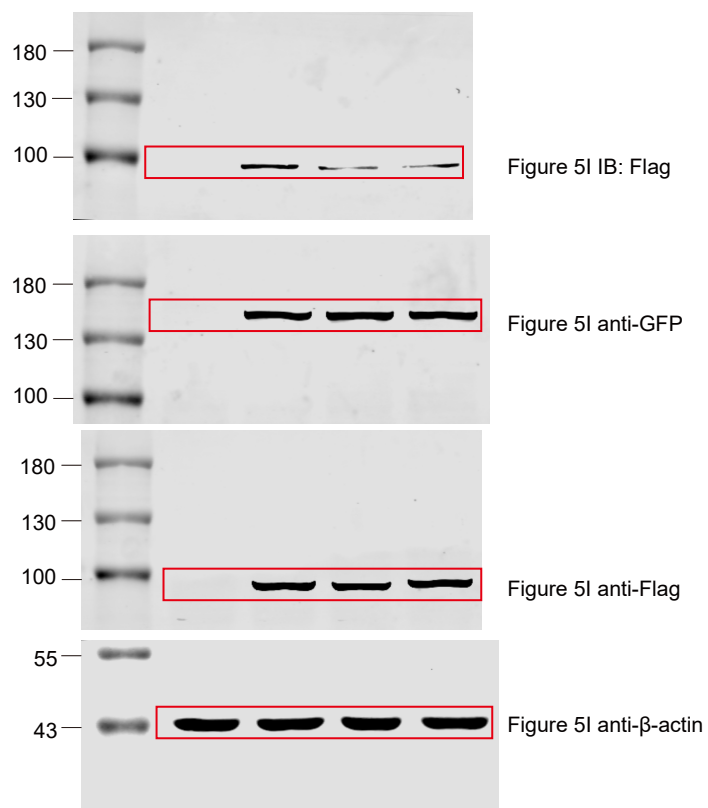

Source data for figure 6

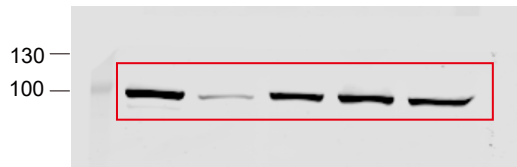

Figure 6B anti-DDX21

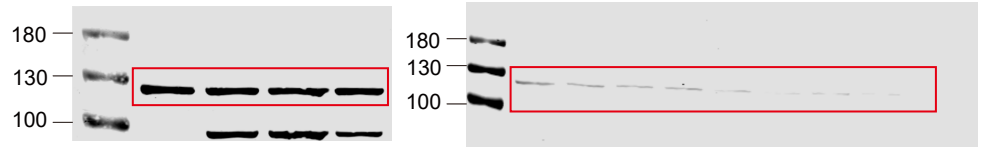

Figure 6E anti-NAT10

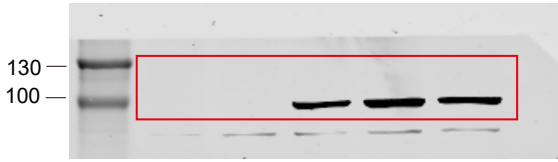

Figure 6B anti-Flag

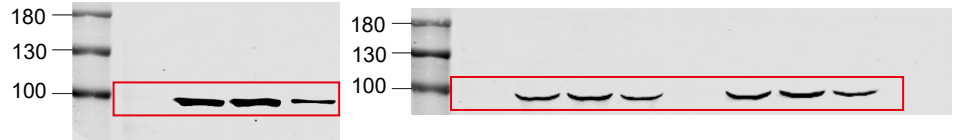

Figure 6E anti-Flag

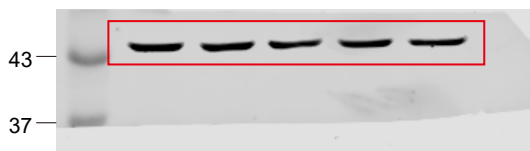

Figure 6B anti-β-actin

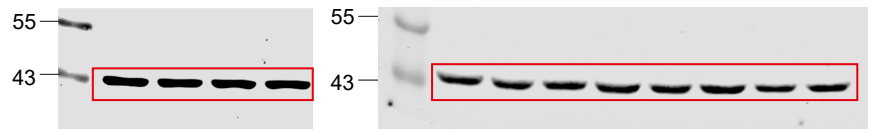

Figure 6E anti-β-actin

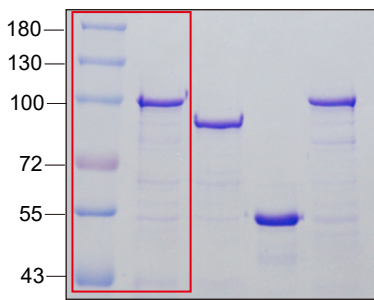

Figure 6G His-DDX21

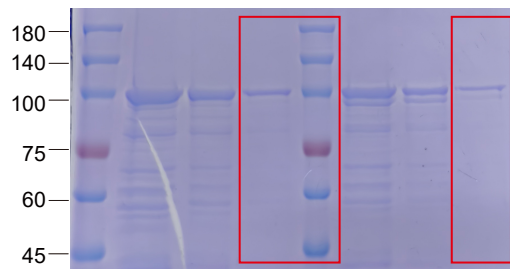

Figure 6G His-DDX21 2KR    Figure 6G His-DDX21 2KQ

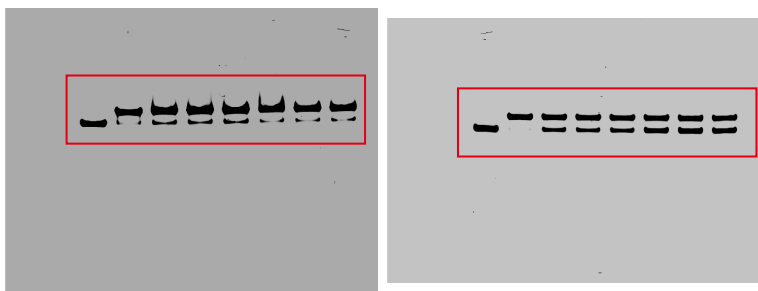

Figure 6H

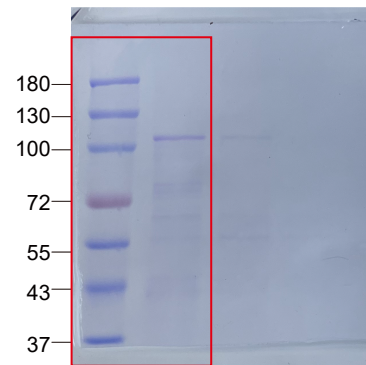

Figure 6I His-NAT10 ΔRHD

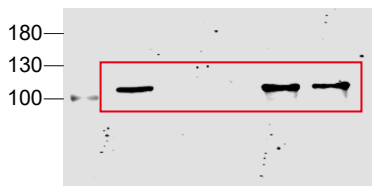

Figure 6J anti-NAT10

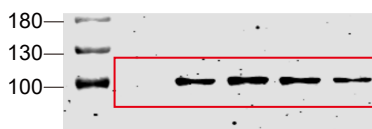

Figure 6J anti-DDX21

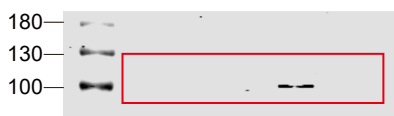

Figure 6J anti-actyl-lysine

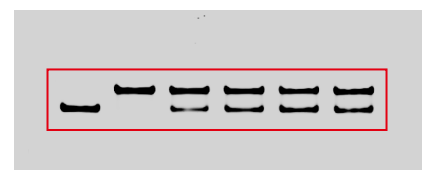

Figure 6K

Source data for Figure 7

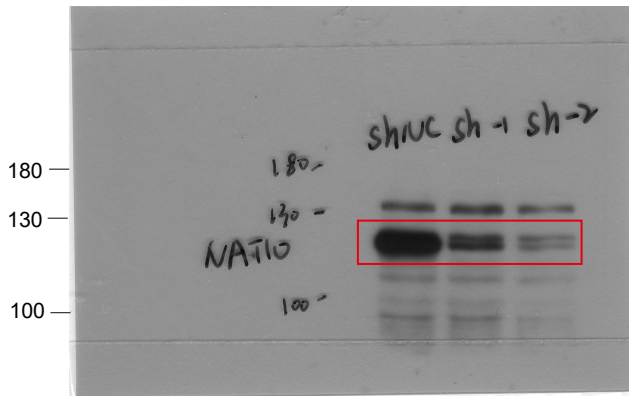

Figure 7C anti-NAT10

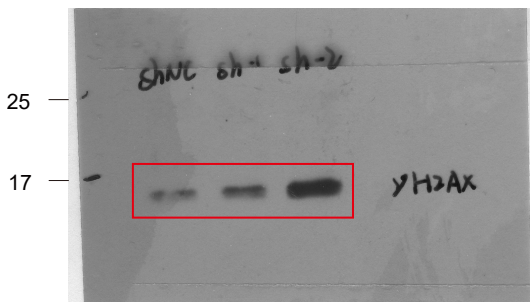

Figure 7C anti-γH2AX

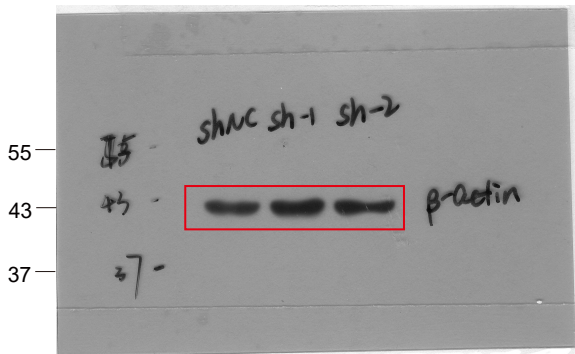

Figure 7C anti-β-actin

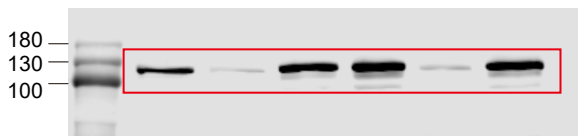

Figure 7D anti-NAT10

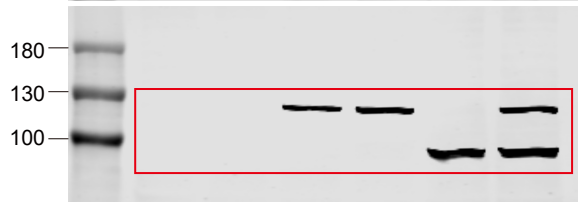

Figure 7D anti-Flag

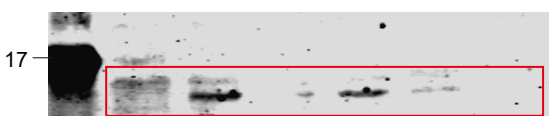

Figure 7D anti-γH2AX

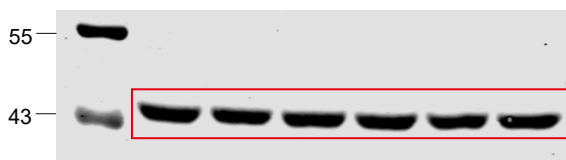

Figure 7D anti-β-actin

Source data for supplementary data

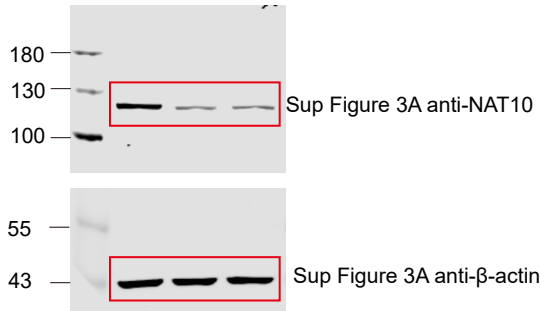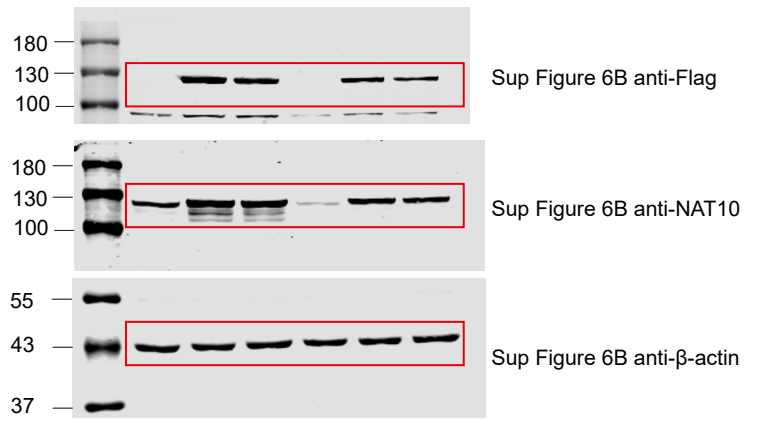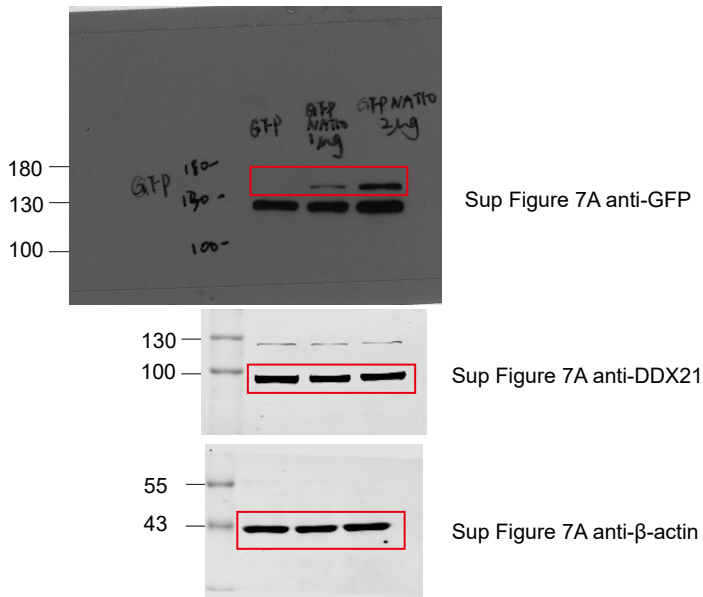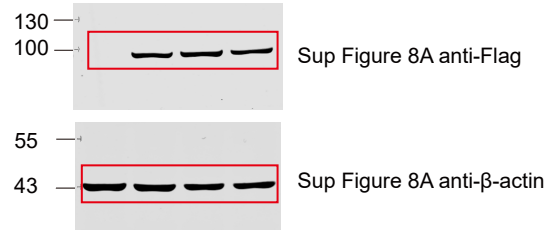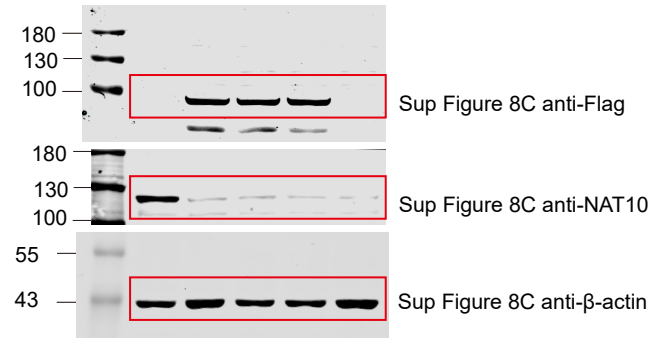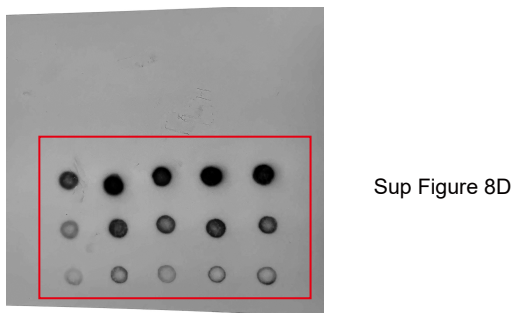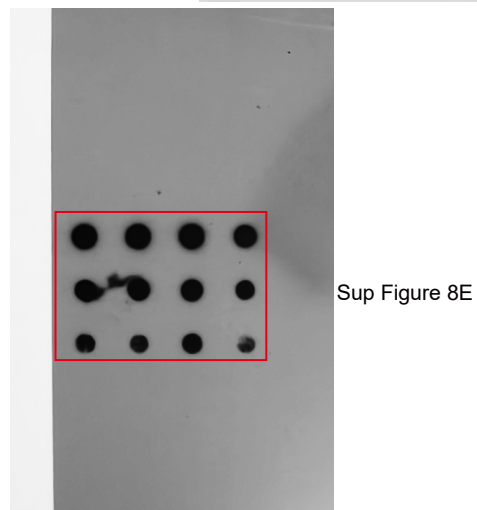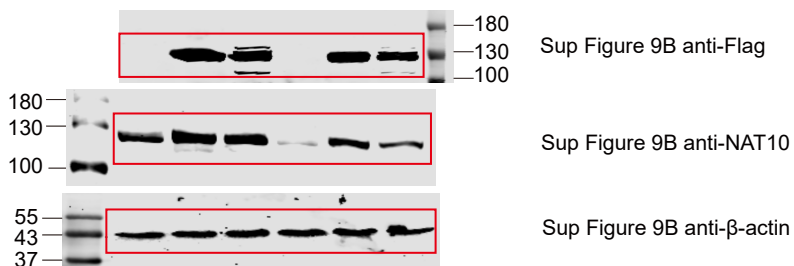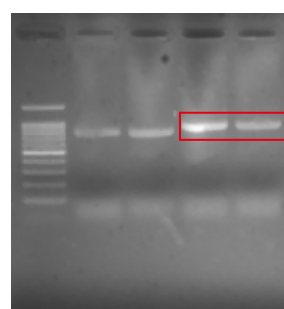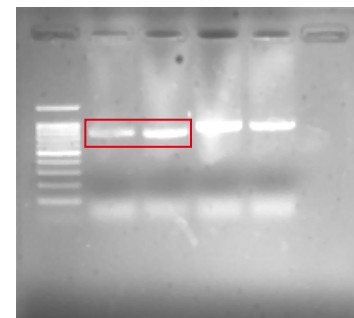

Supplement: 12964_2024_1869_MOESM2_ESM.pdf [file 12964_2024_1869_MOESM2_ESM.pdf]
